# Supplementary material
Source: Springer Nature journal article supplement (https://www.springermedizin.de/resource/supplementary/12891_2007_379_MOESM7_ESM.pdf/9510924)

# Difference between test and retest

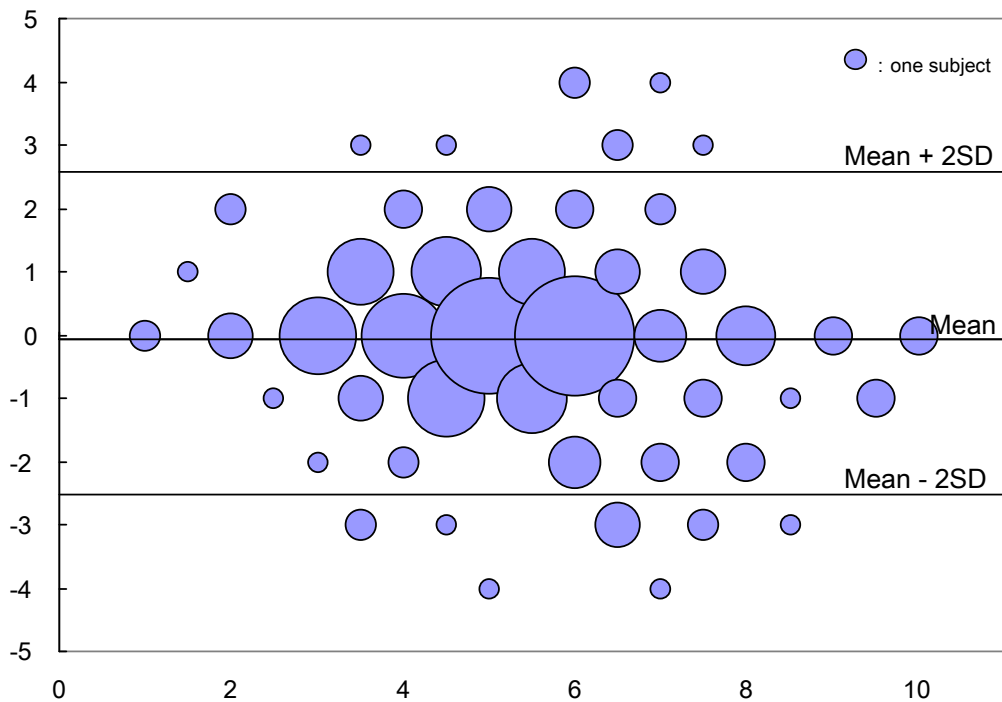

Mean of test and retest

Supplement: MOESM7 [file 9510924]
